# Supplementary material
Source: PubMed Central journal article supplement (PMC9030224)

**Supplemental Table 1. Primer sequence for qPCR analysis.**

| <b>Genes</b> |         | <b>Sequences</b>         |
|--------------|---------|--------------------------|
| Bmal1        | Forward | CGCTTTCTGGAGGGTGTCCGC    |
|              | Reverse | TGCCAGGACGCGCTTGTACC     |
| Nr1d1        | Forward | TGGCATCCGGTGCACTGCAG     |
|              | Reverse | CCCTCCAGAAGGGTAGCACGCT   |
| Nr1d2        | Forward | GGAGTTCATGCTTGTGAAGGCTGT |
|              | Reverse | CAGACACTTCTTAAAGCGGCACTG |
| Per1         | Forward | CTGCCATGGAGGAAGAAGAG     |
|              | Reverse | AGCTGGGGCAGTTTCCTATT     |
| Per2         | Forward | CTCCAGCGAAACGAGAACTG     |
|              | Reverse | TTGGCAGACTGCTCACTACTG    |
| Clock        | Forward | ATGGTGTTTACCGTAAGCTGTAG  |
|              | Reverse | CTCGCGTTACCAGGAAGCAT     |
| Dbp          | Forward | GGAAACAGCAAGCCCAAAGAA    |
|              | Reverse | CAGCGGCGCAAAAAGACTC      |
| 36B4         | Forward | CGCTTTCTGGAGGGTGTCCGC    |
|              | Reverse | TGCCAGGACGCGCTTGTACC     |
| Myod1        | Forward | TGGCATCCGGTGCACTGCAG     |
|              | Reverse | CCCTCCAGAAGGGTAGCACGCT   |
| Myf5         | Forward | AGCTGCTGAGGGAACAGGTGGA   |
|              | Reverse | ATTCAGGCATGCCGTCAGAGCA   |
| Myogenin     | Forward | GTCCCAACCCAGGAGATCATT    |
|              | Reverse | AGTTGGGCATGGTTTCGTCT     |
| CyclinD1     | Forward | GCGTACCCTGACACCAATCTC    |
|              | Reverse | CTCCTCTTCGCACTTCTGCTC    |
| C-Met        | Forward | TGGGCCGGCTTAACCAAGTGC    |
|              | Reverse | AGCACCACCTGCATGAAGCGA    |
| P21          | Forward | CCTGGTGATGTCCGACCTG      |
|              | Reverse | CCATGAGCGCATCGCAATC      |
| c-Myc        | Forward | CAACGACAGCAGCTCGCCCA     |
|              | Reverse | ACTAGGGGCTCAGGGCTGGC     |
| P27          | Forward | TCAAACGTGAGAGTGTCTAACG   |
|              | Reverse | CCGGGCCGAAGAGATTTCTG     |

**Supplemental Table 2. Primary antibodies list.**

| Antibody | Source                                  | Cat#        | Dilution |
|----------|-----------------------------------------|-------------|----------|
| Rev-erba | Thermo Scientific                       | PA5-29865   | 1:1000   |
| Bmal1    | Santa Cruz                              | SC-365645   | 1:1000   |
| eMyHC    | Developmental studies<br>Hybridoma Bank | BF-45       | 1:50     |
| Pax7     | Developmental studies<br>Hybridoma Bank | Pax7        | 1:50     |
| GAPDH    | ThermoFisher                            | AM4300      | 1:3000   |
| Laminin  | Sigma Aldrich                           | L9393       | 1:60     |
| Ki67     | ThermoFisher                            | 50 112 9742 | 1:50     |

**Supplemental Fig.1**

Masson's Trichrome staining of Gastrocnemius cross sections of 20-week-old mdx and BmKO/mdx mice at 4X magnification. Scale bar: 200  $\mu$ M.

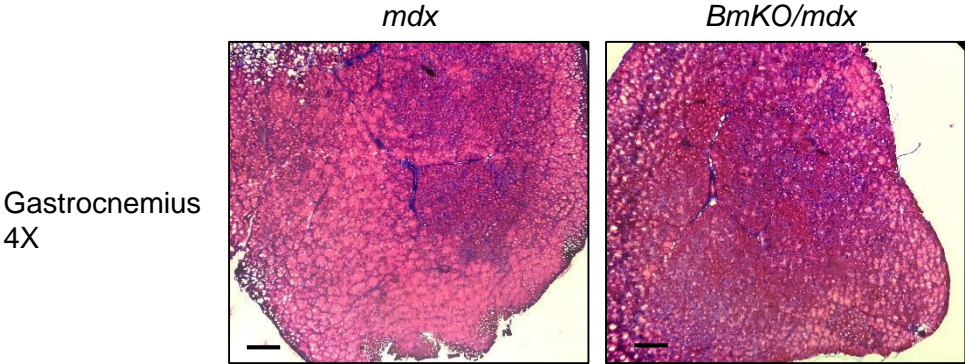

Supplement: NIHMS1771123-supplement-1.pdf [file NIHMS1771123-supplement-1.pdf]
